# Supplementary material for: Preparation and photophysical characterisation of Zn–Al layered double hydroxides intercalated by anionic pyrene derivatives
Source: Royal Society of Chemistry journal article supplement (doi:10.1039/b715319h), 2008-01-01
Supplement: b715319h.pdf [file b715319h.pdf]

# **Journal of Materials Chemistry**

## **Electronic Supplementary Information**

### **Preparation and photophysical characterisation of Zn-Al layered double hydroxides intercalated by anionic pyrene derivatives**

**Sandra Gago,<sup>a</sup> Telma Costa,<sup>b</sup> J. Seixas de Melo,<sup>\*b</sup> Isabel S. Gonçalves<sup>a</sup> and Martyn Pillinger<sup>\*a</sup>**

<sup>a</sup> *Department of Chemistry, CICECO, University of Aveiro, 3810-193 Aveiro, Portugal. E-mail: mpillinger@ua.pt*

<sup>b</sup> *Chemistry Department, University of Coimbra, 3004-535 Coimbra, Portugal. E-mail: sseixas@ci.uc.pt*

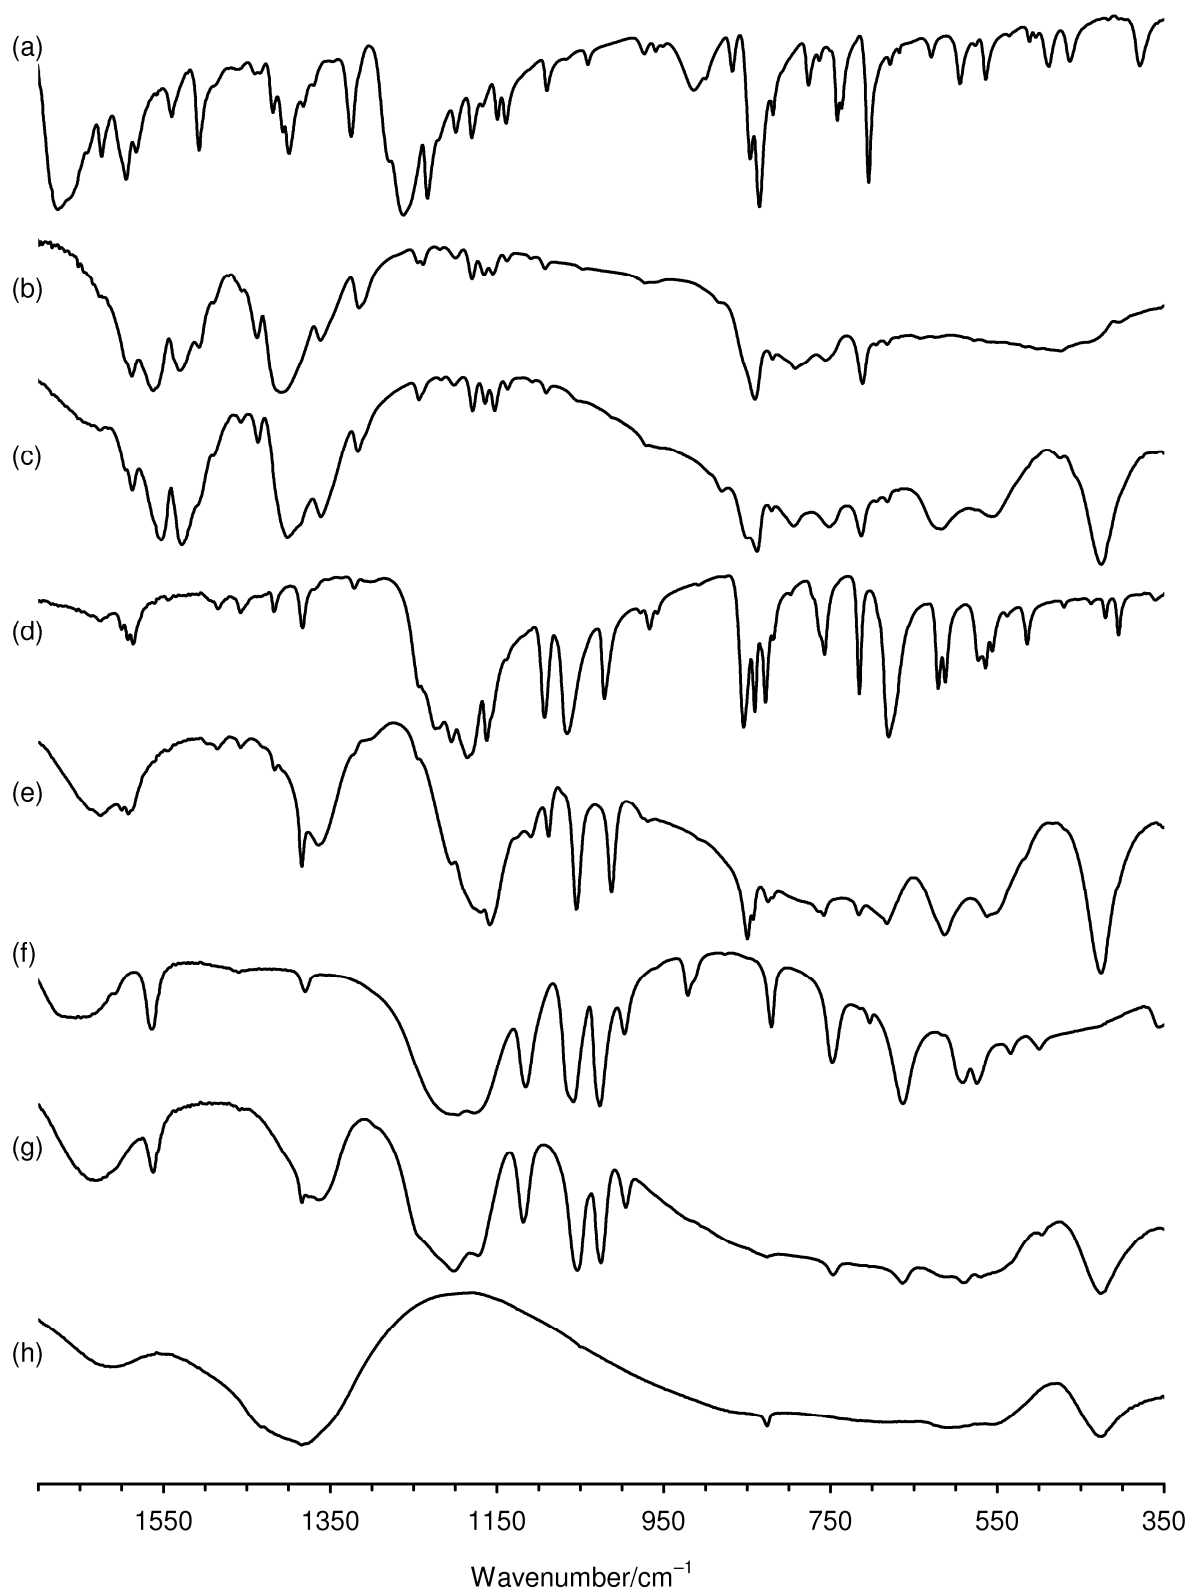

**Fig. S1.** FTIR spectra of (a) 1-pyrenecarboxylic acid, (b) Zn-Al-PC<sub>cal</sub>, (c) Zn-Al-PC, (d) sodium 1-pyrenesulfonate, (e) Zn-Al-PS, (f) tetrasodium 1,3,6,8-pyrenetetrasulfonate hydrate, (g) Zn-Al-PTS, and (h) Zn-Al-NO<sub>3</sub>.

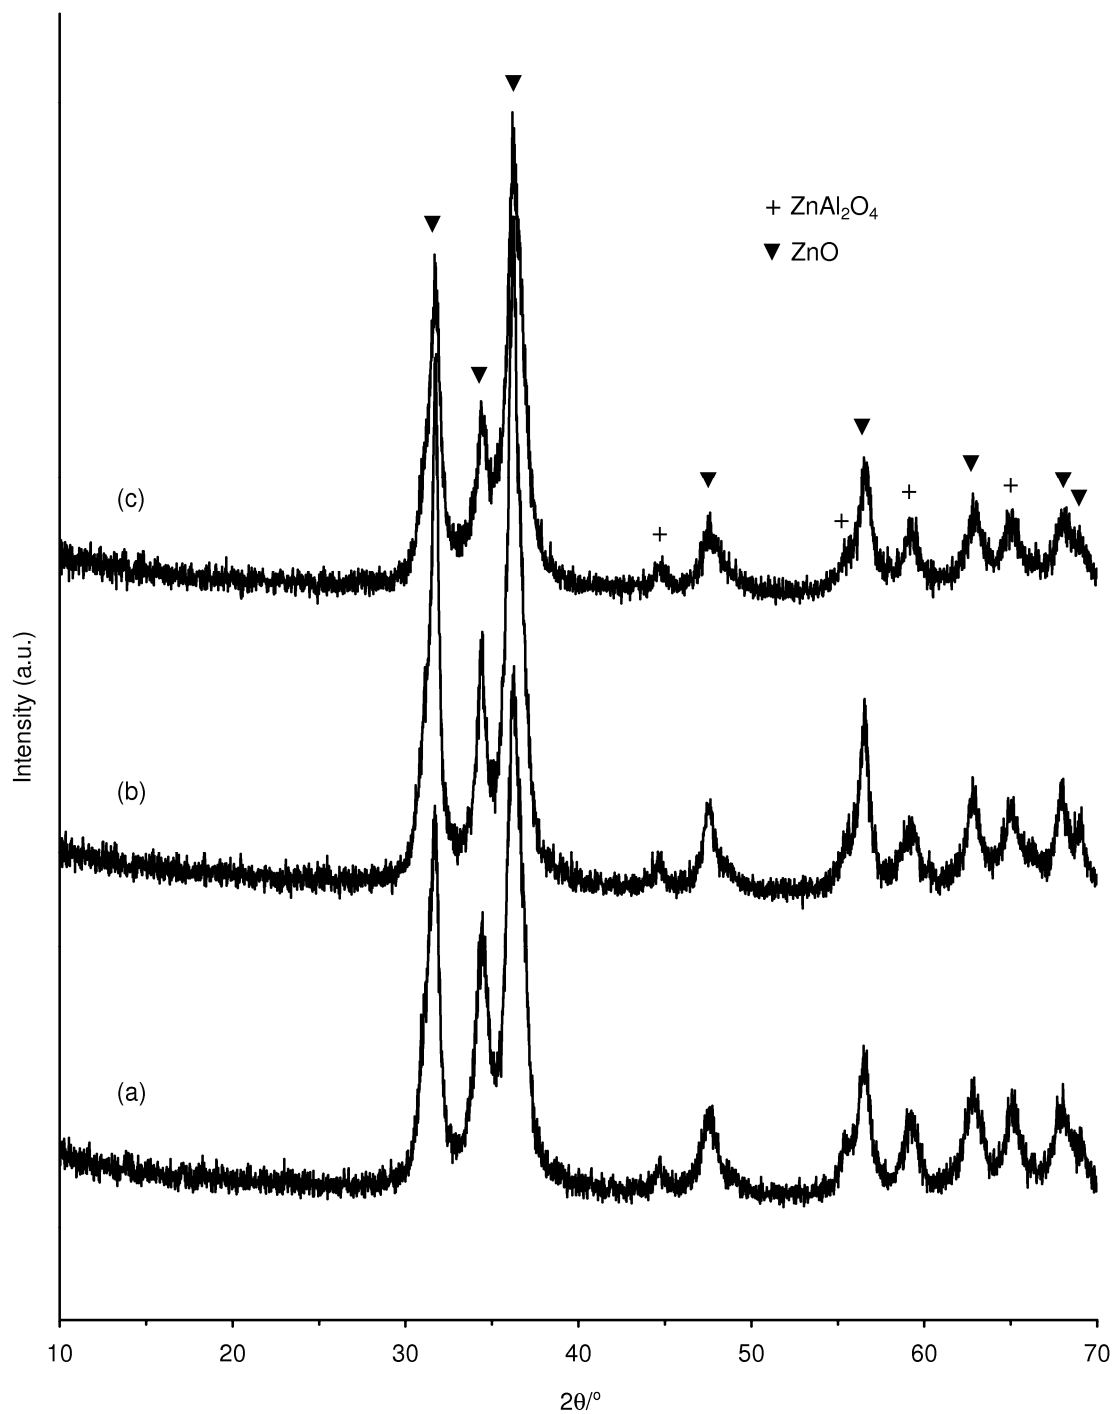

**Fig. S2.** Powder XRD patterns ( $\text{Cu-K}\alpha$  X-radiation,  $\lambda = 1.54060 \text{ \AA}$ ) of the following samples calcined under static air for 3 h at  $700^\circ\text{C}$ : (a) Zn-Al-PC, (b) Zn-Al-PS, and (c) Zn-Al-PTS.
